# Supplementary material for: SIBaR: A New Method for Background Quantification and Removal from Mobile Air Pollution Measurements
Source: Copernicus journal article supplement (doi:10.5194/amt-2021-5), 2021-01-28
Supplement: Supplementary file 1 [file amt-2021-5-supplement.pdf]

# Supplemental Information for SIBaR: A New Method for Background Quantification and Removal from Mobile Air Pollution Measurements

Blake Actkinson<sup>1</sup>, Katherine Ensor<sup>2</sup>, Robert J. Griffin<sup>1,3</sup>

<sup>1</sup>Department of Civil and Environmental Engineering, Rice University, Houston, TX 77005, USA

<sup>2</sup>Department of Statistics, Rice University, Houston, TX 77005, USA

<sup>3</sup>Department of Chemical and Biomolecular Engineering, Rice University, Houston, TX 77005, USA

| Census Tracts                           | Population<br>Total | # Metal<br>Recyclers | # Concrete Batch<br>Plants | # Petrochemical<br>Facilities |
|-----------------------------------------|---------------------|----------------------|----------------------------|-------------------------------|
| <b>Northwest Domain</b>                 | <b>34873</b>        | <b>7</b>             | <b>2</b>                   | <b>0</b>                      |
| North Spring Branch                     | 5126                | 0                    | 0                          | 0                             |
| South Spring Branch                     | 3604                | 0                    | 0                          | 0                             |
| Memorial Park                           | 6908                | 0                    | 0                          | 0                             |
| Washington Corridor                     | 5432                | 2                    | 0                          | 0                             |
| North River Oaks                        | 1803                | 0                    | 0                          | 0                             |
| South River Oaks                        | 2775                | 0                    | 0                          | 0                             |
| West Eastex                             | 2753                | 5                    | 2                          | 0                             |
| North Heights                           | 6472                | 1                    | 0                          | 0                             |
| <b>Southwest Domain</b>                 | <b>24927</b>        | <b>0</b>             | <b>1</b>                   | <b>0</b>                      |
| Westchase                               | 5548                | 0                    | 0                          | 0                             |
| Sharpstown                              | 5616                | 0                    | 0                          | 0                             |
| Sharpstown North                        | 3484                | 0                    | 1                          | 0                             |
| Sharpstown South                        | 5196                | 0                    | 0                          | 0                             |
| Bayland Park                            | 5083                | 0                    | 0                          | 0                             |
| <b>South Beltway<br/>Central Domain</b> | <b>2530</b>         | <b>3</b>             | <b>8</b>                   | <b>0</b>                      |
| South Beltway<br>Central                | 2530                | 3                    | 8                          | 0                             |
| <b>Rice Domain</b>                      | <b>8247</b>         | <b>0</b>             | <b>0</b>                   | <b>0</b>                      |
| North Rice                              | 2892                | 0                    | 0                          | 0                             |
| South Rice                              | 5355                | 0                    | 0                          | 0                             |
| <b>Ship Channel<br/>Domain</b>          | <b>20177</b>        | <b>4</b>             | <b>1</b>                   | <b>4</b>                      |
| Clinton                                 | 2127                | 2                    | 1                          | 1                             |
| West Galena Park                        | 5245                | 0                    | 0                          | 0                             |
| East Galena Park                        | 3000                | 0                    | 0                          | 0                             |
| Manchester                              | 1647                | 0                    | 0                          | 1                             |
| Harrisburg                              | 1496                | 2                    | 0                          | 2                             |
| Milby Park                              | 6662                | 0                    | 0                          | 0                             |

Table S1. Neighborhood summary table which includes the total population and number of important point source emitters within each neighborhood. Data courtesy of the U.S. Census and Environmental Defense Fund (Census 2010; Environmental Defense Fund). Domain names refer to direction from downtown or local landmarks (such as Rice University).

| Parameter       | Instrument                      |
|-----------------|---------------------------------|
| NO              | T200 NO Analyzer                |
| NO <sub>2</sub> | T500U NO <sub>2</sub> Analyzer  |
| CO <sub>2</sub> | Li-COR CO <sub>2</sub> Analyzer |
| BC              | AE33 Aethalometer               |

**Table S2. Instruments used in campaign to make measurements.**

|           | <i>1</i> | <i>2</i> | <i>3</i> | <i>4</i> | <i>5</i> | <i>6</i> | <i>7</i> | <i>8</i> | <i>9</i> | <i>10</i> | <i>11</i> | <i>12</i> |
|-----------|----------|----------|----------|----------|----------|----------|----------|----------|----------|-----------|-----------|-----------|
| <i>1</i>  | 0.0000   | 0.0017   | 0.0040   | 0.0113   | 0.0145   | 0.0146   | 0.0153   | 0.0059   | 0.0059   | 0.0164    | 0.0115    | 0.0068    |
| <i>2</i>  |          | 0.0000   | 0.0041   | 0.0112   | 0.0143   | 0.0147   | 0.0150   | 0.0058   | 0.0058   | 0.0163    | 0.0114    | 0.0075    |
| <i>3</i>  |          |          | 0.0000   | 0.0101   | 0.0147   | 0.0146   | 0.0151   | 0.0042   | 0.0042   | 0.0154    | 0.0118    | 0.0081    |
| <i>4</i>  |          |          |          | 0.0000   | 0.0154   | 0.0111   | 0.0158   | 0.0120   | 0.0119   | 0.0167    | 0.0130    | 0.0142    |
| <i>5</i>  |          |          |          |          | 0.0000   | 0.0087   | 0.0039   | 0.0151   | 0.0152   | 0.0194    | 0.0183    | 0.0168    |
| <i>6</i>  |          |          |          |          |          | 0.0000   | 0.0087   | 0.0153   | 0.0153   | 0.0196    | 0.0181    | 0.0165    |
| <i>7</i>  |          |          |          |          |          |          | 0.0000   | 0.0148   | 0.0148   | 0.0192    | 0.0195    | 0.0168    |
| <i>8</i>  |          |          |          |          |          |          |          | 0.0000   | 0.0003   | 0.0144    | 0.0128    | 0.0069    |
| <i>9</i>  |          |          |          |          |          |          |          |          | 0.0000   | 0.0143    | 0.0128    | 0.0068    |
| <i>10</i> |          |          |          |          |          |          |          |          |          | 0.0000    | 0.0168    | 0.0161    |
| <i>11</i> |          |          |          |          |          |          |          |          |          |           | 0.0000    | 0.0135    |
| <i>12</i> |          |          |          |          |          |          |          |          |          |           |           | 0.0000    |

**Table S3. Pairwise RMSE values between different iterations of SIBaR.**

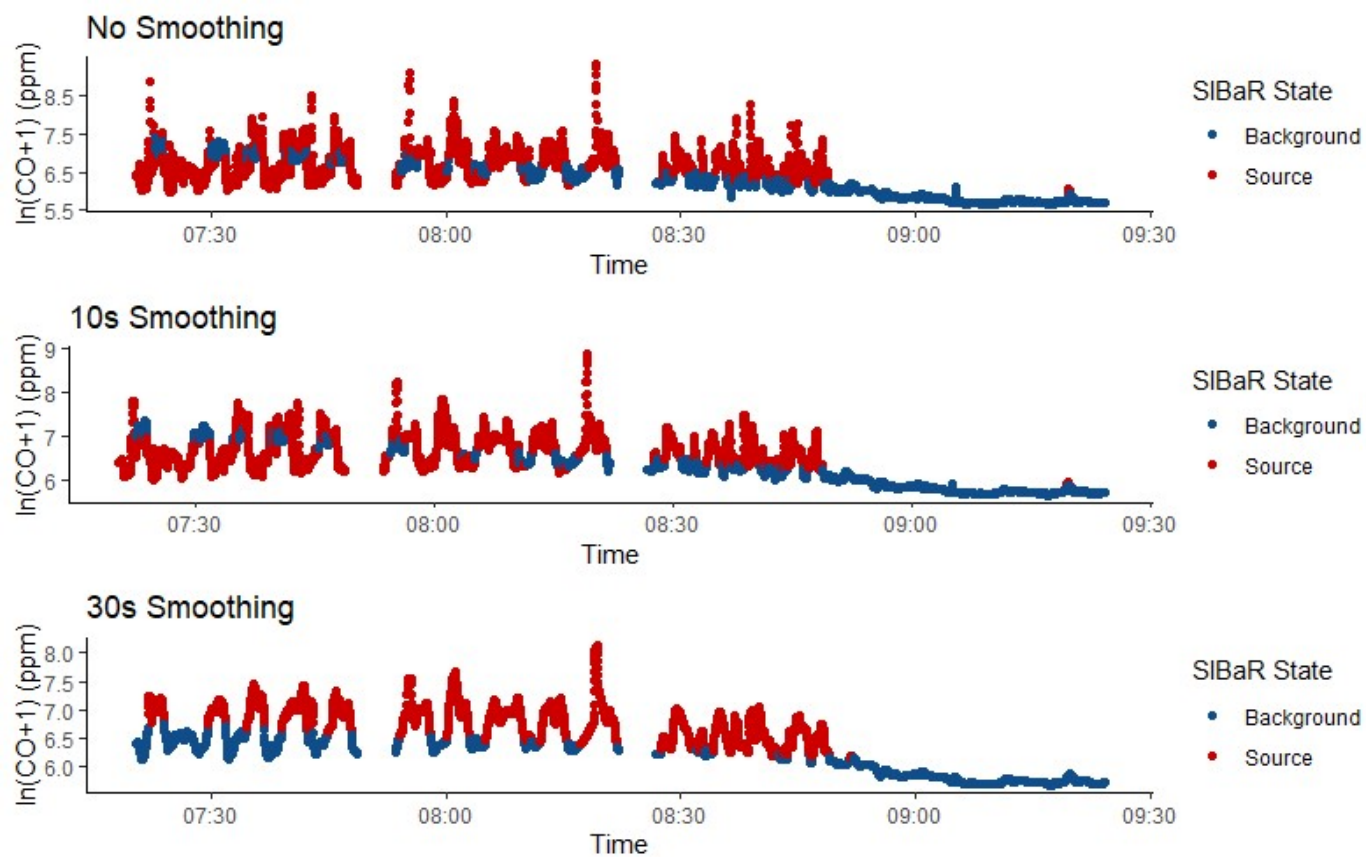

**Figure S1. SIBaR state designation time window sensitivity.**

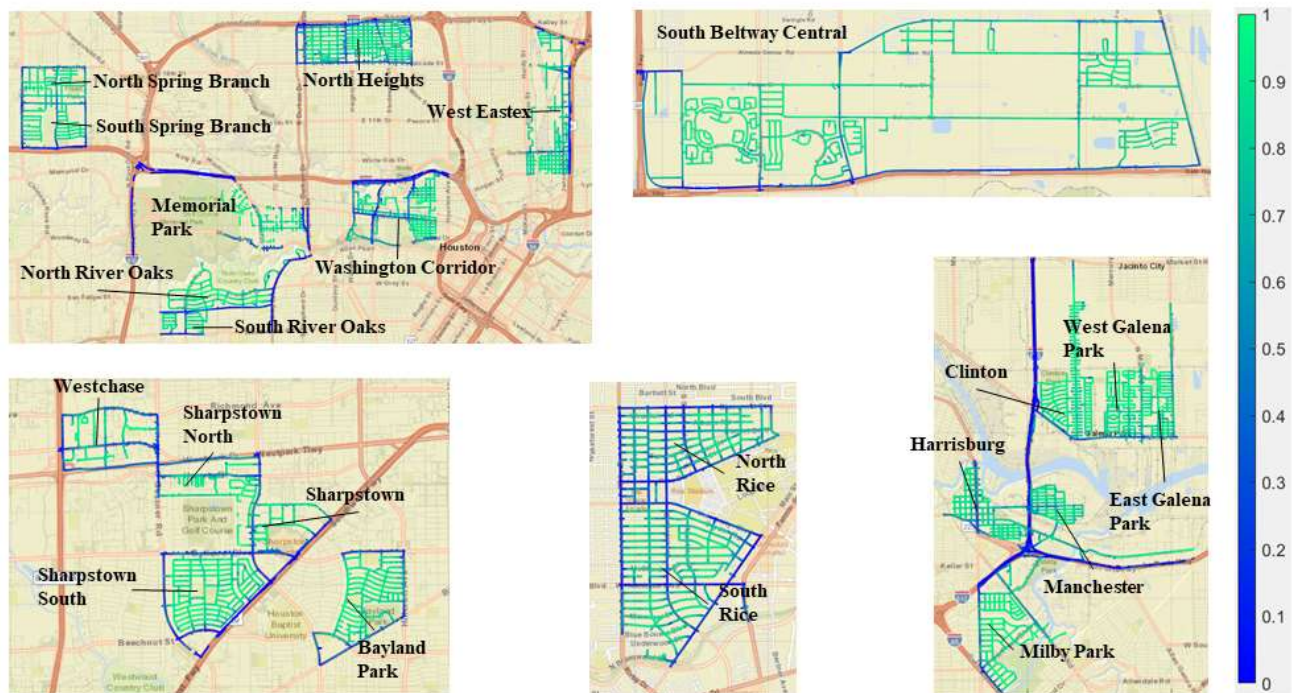

**Figure S2. CO<sub>2</sub> mapped fractional contributions.** A value of 1 implies all measurements reflect background, while a value of 0 implies all measurements reflect non-background. Basemap generated by Matlab geobasemap ‘streets’ and is hosted by ESRI (Sources: Esri, DeLorme, HERE, USGS, Intermap, iPC, NRCAN, Esri Japan, METI, Esri China (Hong Kong), Esri (Thailand), MapmyIndia, Tomtom).

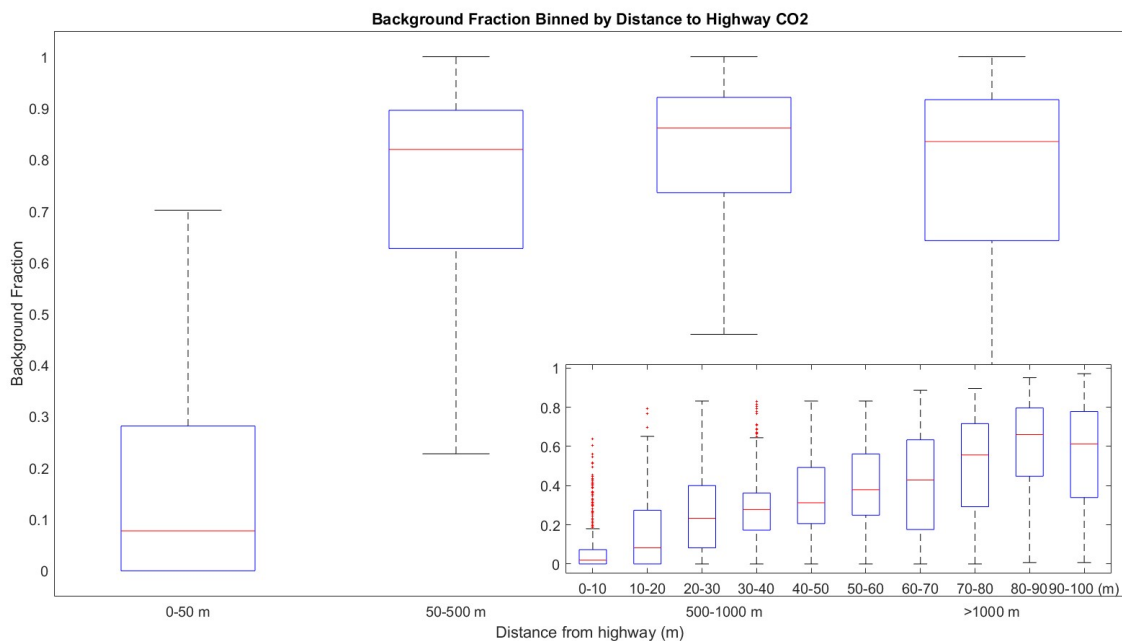

**Figure S3. CO<sub>2</sub> background fraction boxplot binned by distance.**

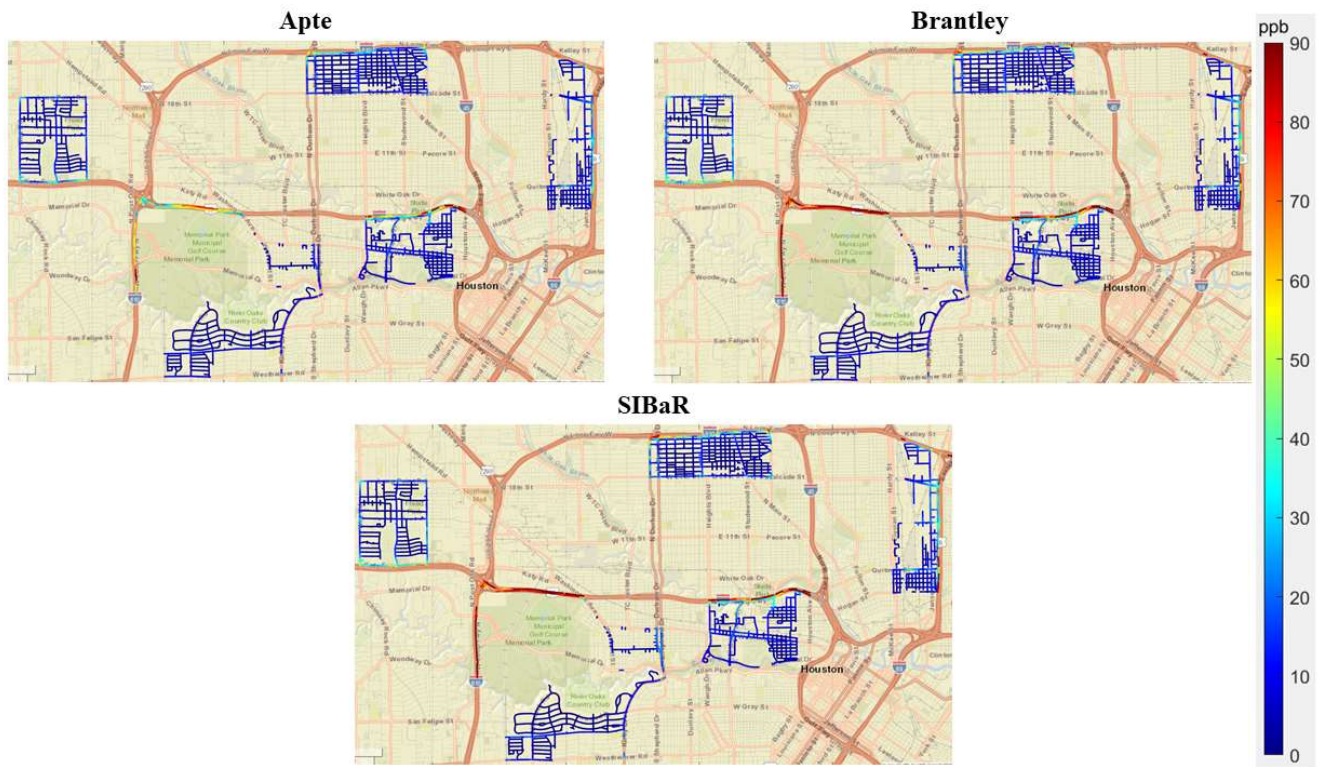

**Figure S4. Mapped median NO<sub>x</sub> source contributions. Northwest quadrant. Basemap generated by Matlab geobasemap ‘streets’ and is hosted by ESRI (Sources: Esri, DeLorme, HERE, USGS, Intermap, iPC, NRCAN, Esri Japan, METI, Esri China (Hong Kong), Esri (Thailand), MapmyIndia, Tomtom).**

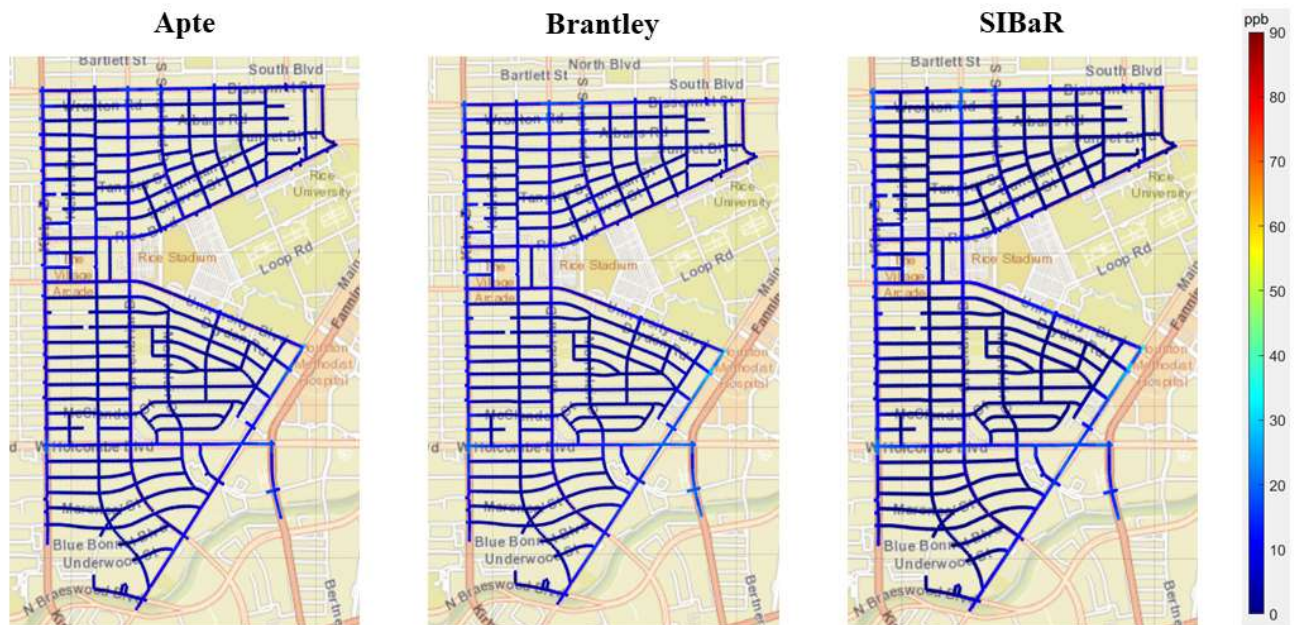

**Figure S5. Mapped median NO<sub>x</sub> source contributions. North and South Rice. Basemap generated by Matlab geobasemap ‘streets’ and is hosted by ESRI (Sources: Esri, DeLorme, HERE, USGS, Intermap, iPC, NRCAN, Esri Japan, METI, Esri China (Hong Kong), Esri (Thailand), MapmyIndia, Tomtom).**

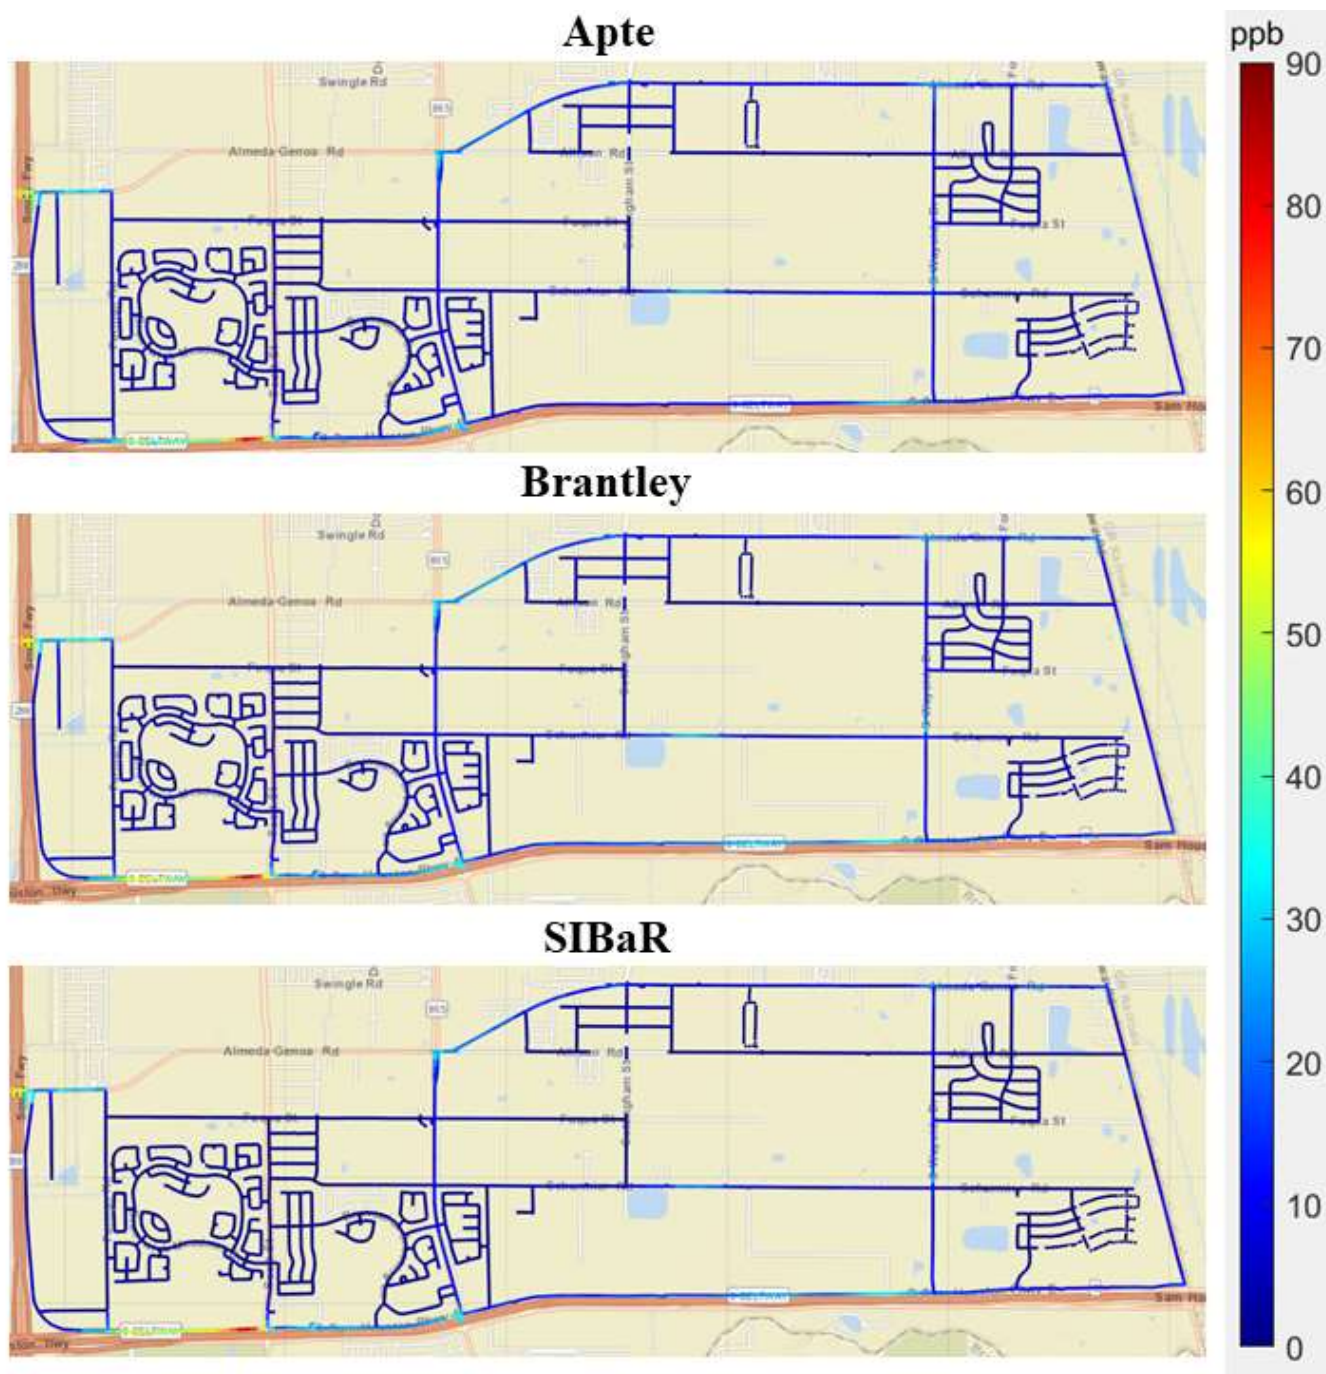

**Figure S6. Mapped median NO<sub>x</sub> source contributions. South Beltway Central. Basemap generated by Matlab geobasemap 'streets' and is hosted by ESRI (Sources: Esri, DeLorme, HERE, USGS, Intermap, iPC, NRCAN, Esri Japan, METI, Esri China (Hong Kong), Esri (Thailand), MapmyIndia, Tomtom).**

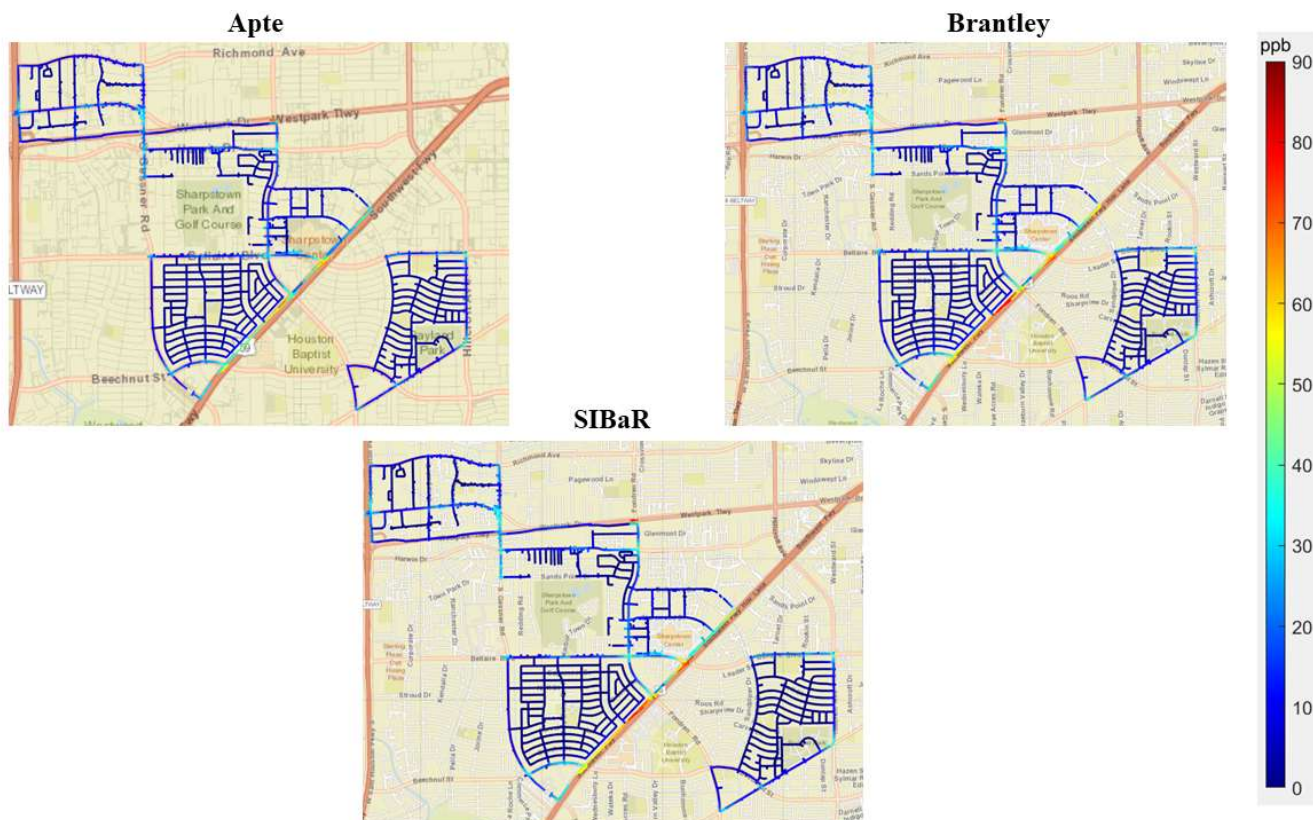

**Figure S7. Mapped median NO<sub>x</sub> source contributions. Southwest quadrant. Basemap generated by Matlab geobasemap ‘streets’ and is hosted by ESRI (Sources: Esri, DeLorme, HERE, USGS, Intermap, iPC, NRCAN, Esri Japan, METI, Esri China (Hong Kong), Esri (Thailand), MapmyIndia, Tomtom).**

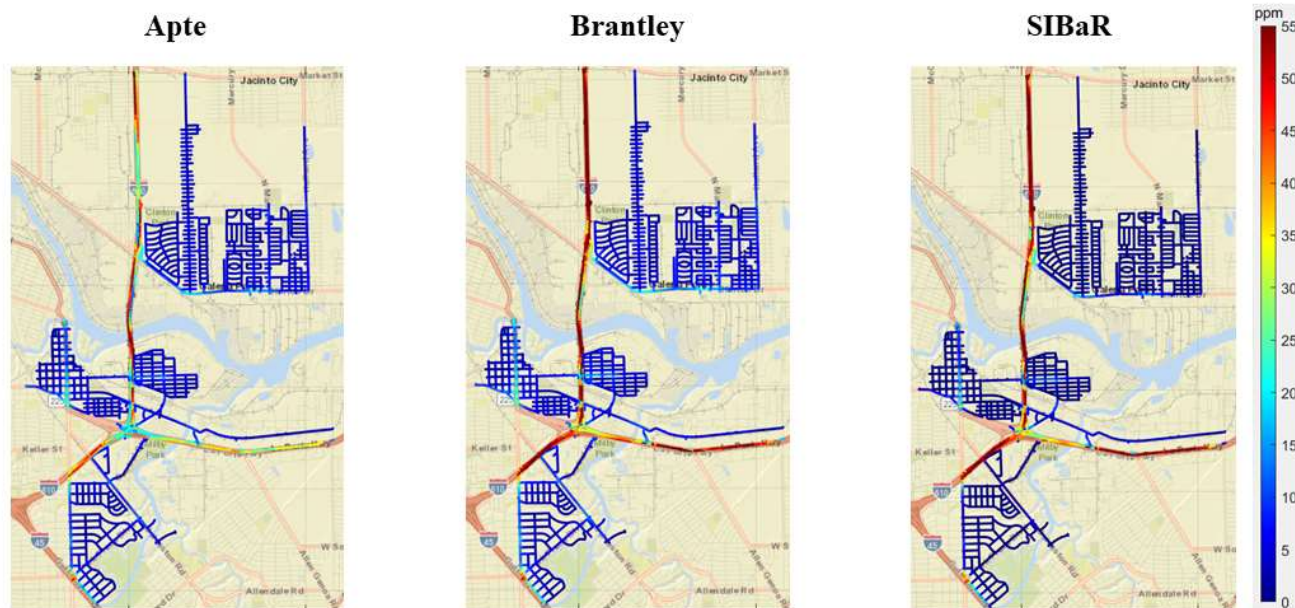

**Figure S8. CO<sub>2</sub> mapped median source contributions. Ship Channel. Basemap generated by Matlab geobasemap ‘streets’ and is hosted by ESRI (Sources: Esri, DeLorme, HERE, USGS, Intermap, iPC, NRCAN, Esri Japan, METI, Esri China (Hong Kong), Esri (Thailand), MapmyIndia, Tomtom).**

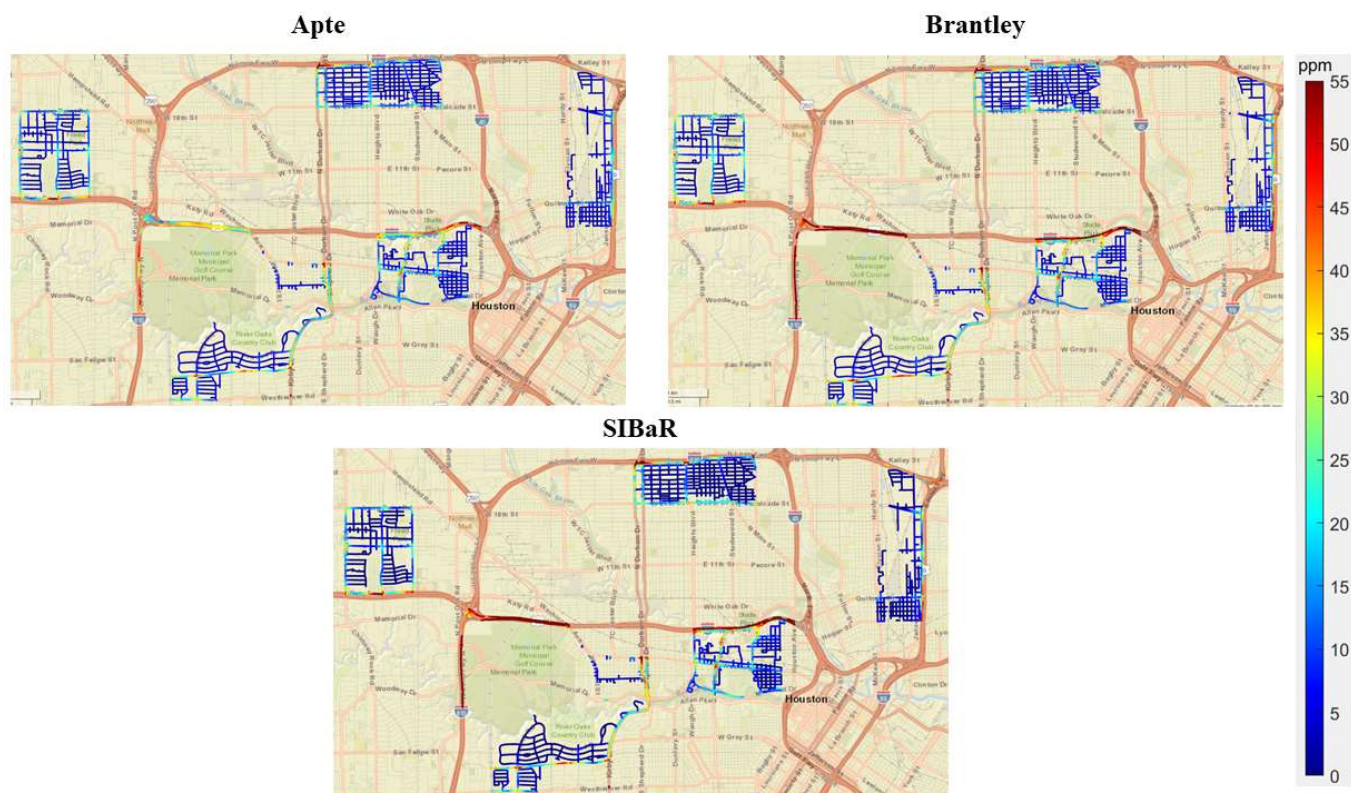

**Figure S9. CO<sub>2</sub> mapped median source contributions. Northwest domain. Basemap generated by Matlab geobasemap ‘streets’ and is hosted by ESRI (Sources: Esri, DeLorme, HERE, USGS, Intermap, iPC, NRCAN, Esri Japan, METI, Esri China (Hong Kong), Esri (Thailand), MapmyIndia, Tomtom).**

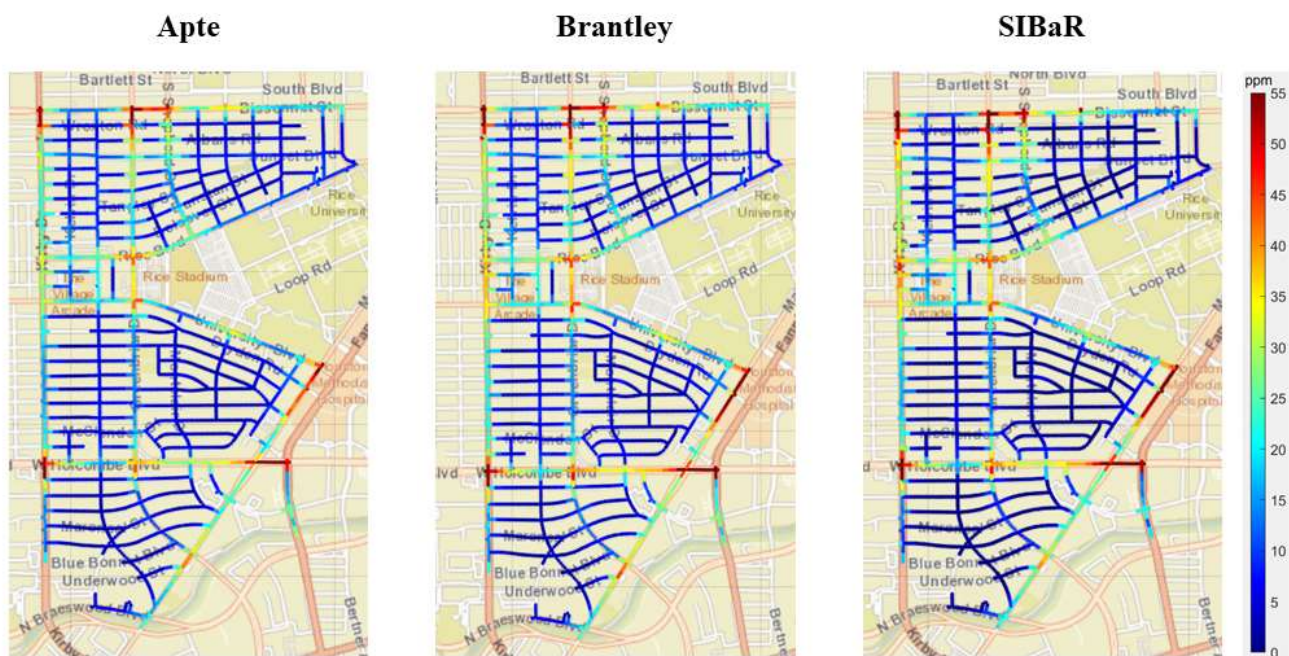

**Figure S10. CO<sub>2</sub> mapped median source contributions. North and South Rice. Basemap generated by Matlab geobasemap ‘streets’ and is hosted by ESRI (Sources: Esri, DeLorme, HERE, USGS, Intermap, iPC, NRCAN, Esri Japan, METI, Esri China (Hong Kong), Esri (Thailand), MapmyIndia, Tomtom).**

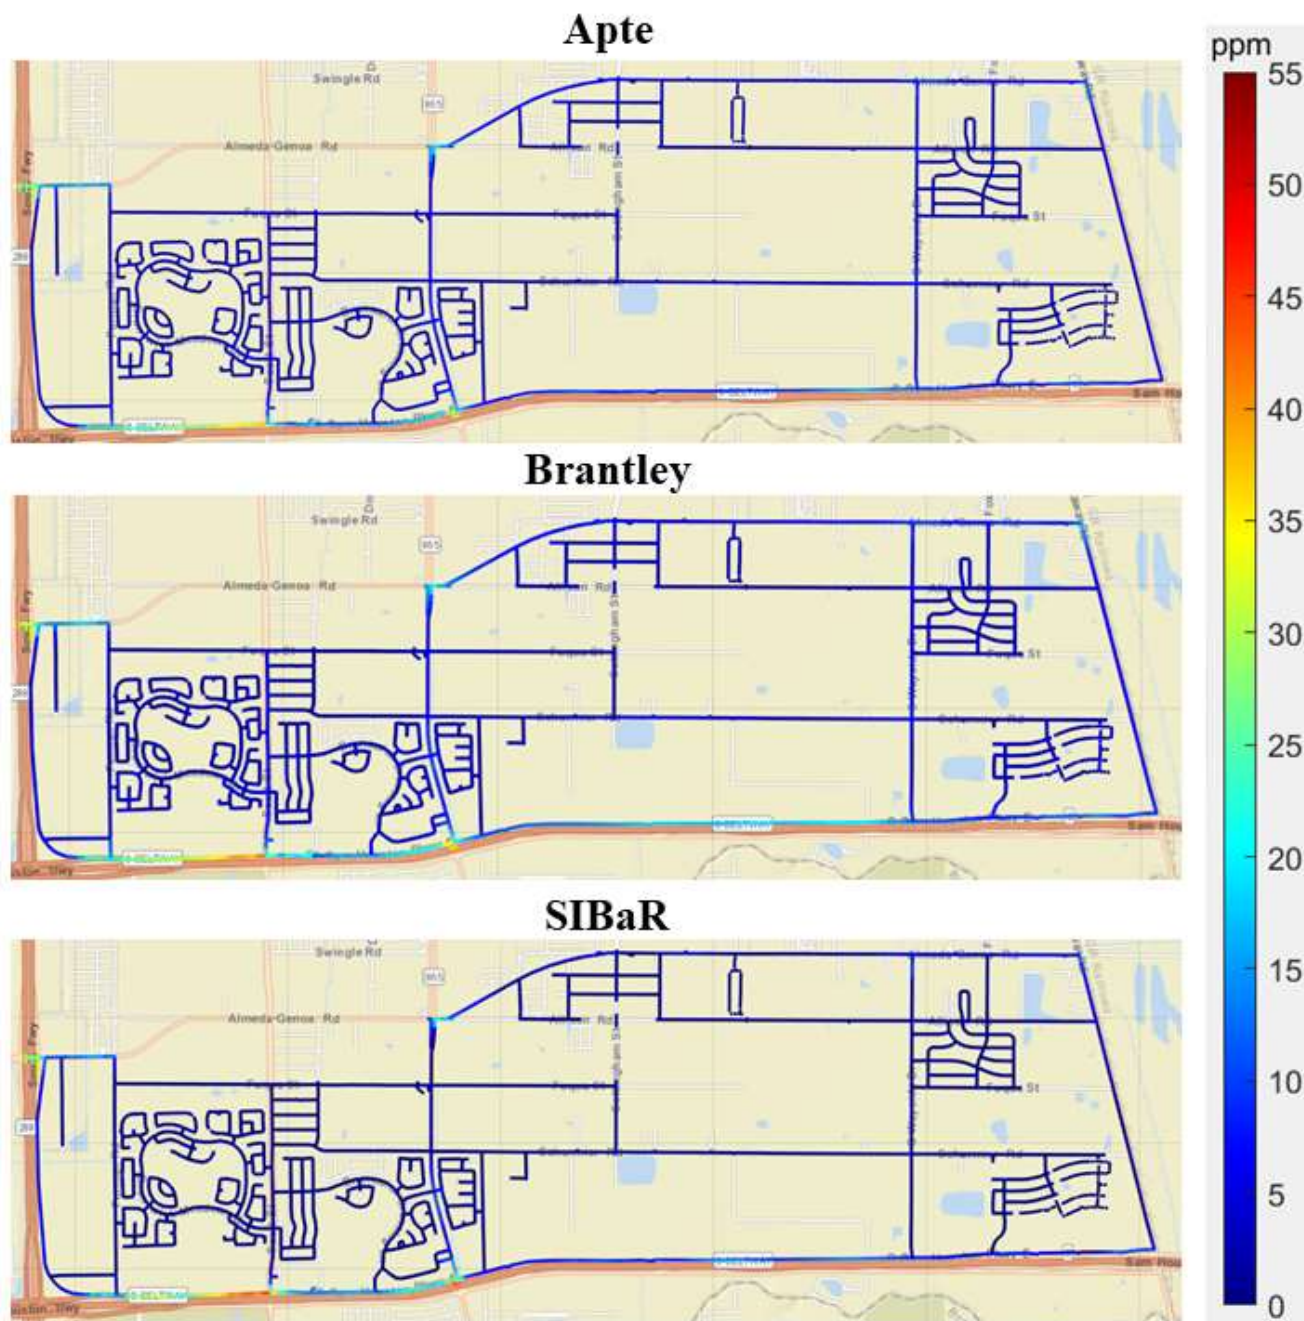

**Figure S11. CO<sub>2</sub> mapped median source contributions. South Beltway Central. Basemap generated by Matlab geobasemap 'streets' and is hosted by ESRI (Sources: Esri, DeLorme, HERE, USGS, Intermap, iPC, NRCAN, Esri Japan, METI, Esri China (Hong Kong), Esri (Thailand), MapmyIndia, Tomtom).**

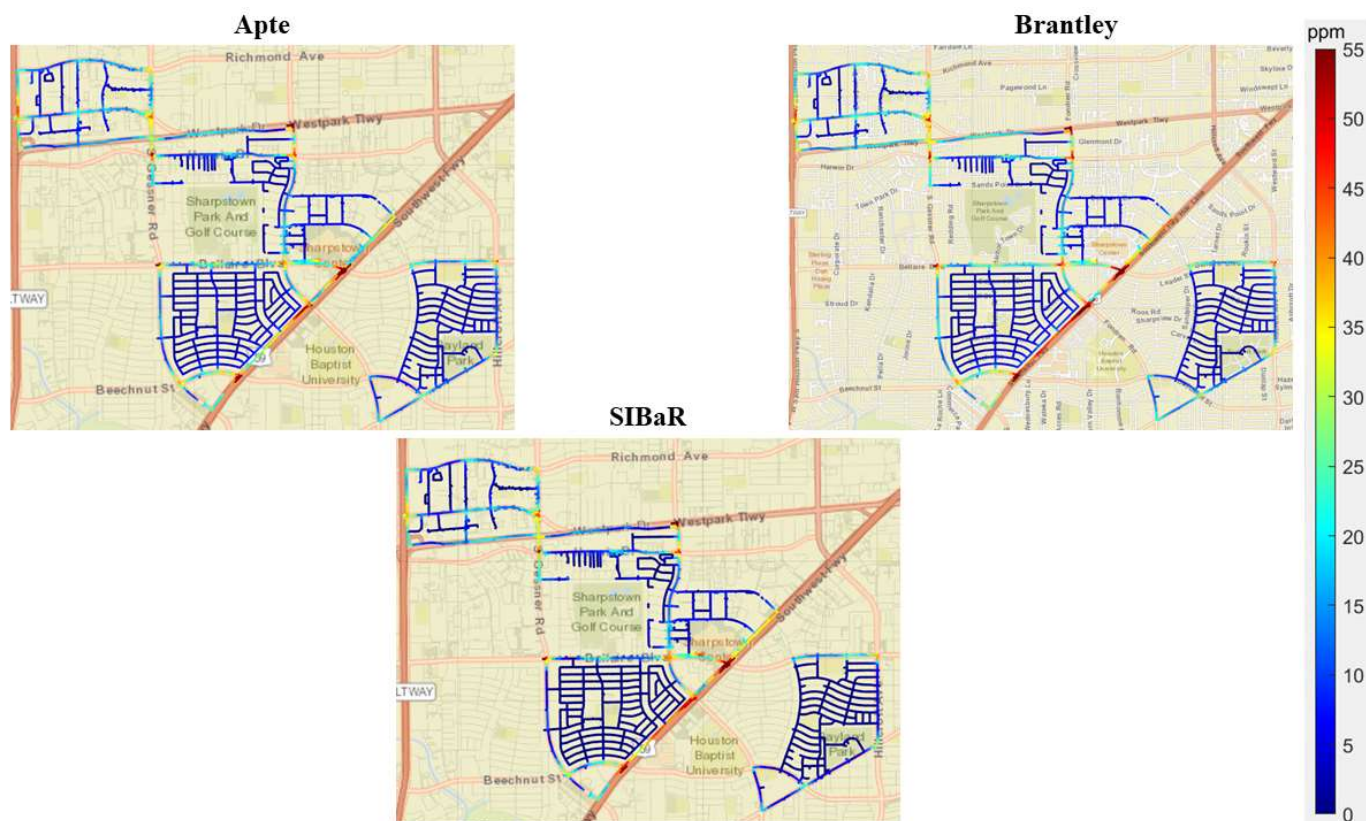

**Figure S12. CO<sub>2</sub> mapped median source contributions. Southwest quadrant. Basemap generated by Matlab geobasemap 'streets' and is hosted by ESRI (Sources: Esri, DeLorme, HERE, USGS, Intermap, iPC, NRCAN, Esri Japan, METI, Esri China (Hong Kong), Esri (Thailand), MapmyIndia, Tomtom).**

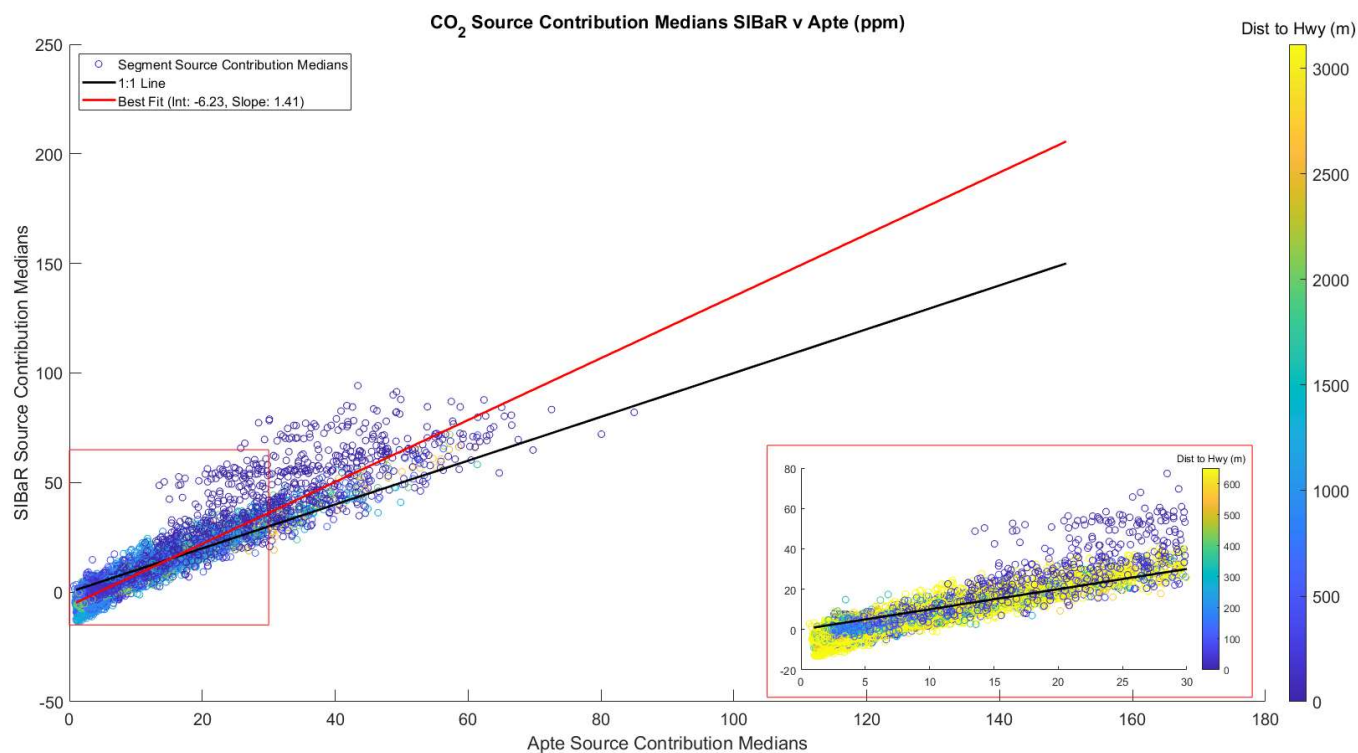

**Figure S13. Comparison of CO<sub>2</sub> Road Segment Median Source Contributions for SIBaR and Apte.**

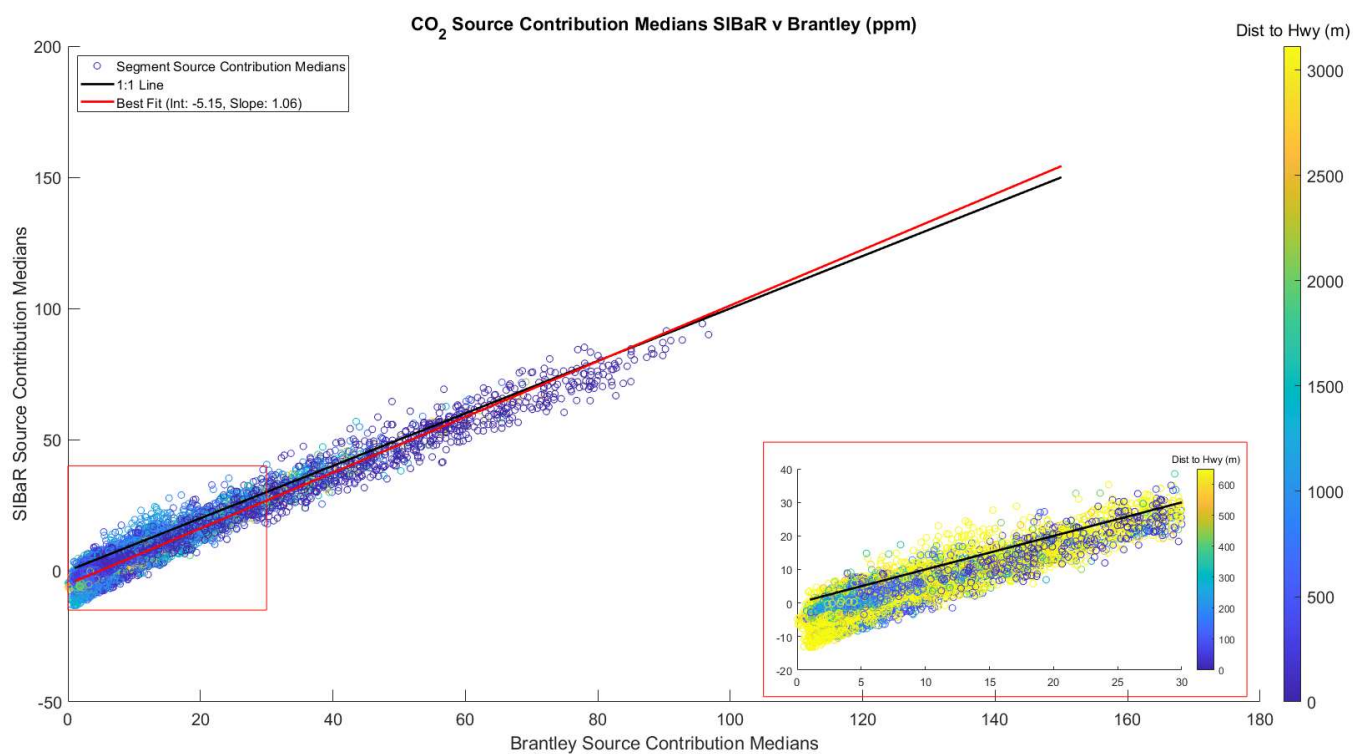

**Figure S14. Comparison of CO<sub>2</sub> Road Segment Median Source Contributions for SIBaR and Brantley.**

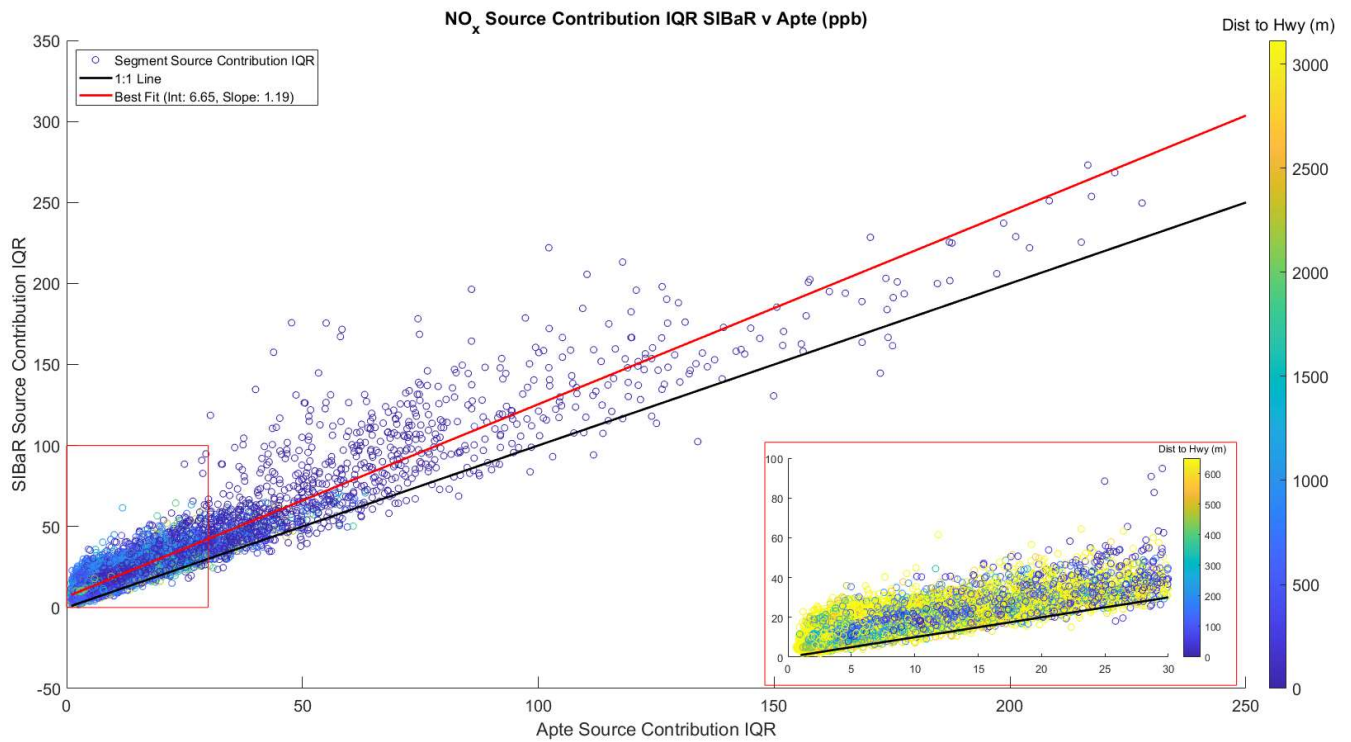

**Figure S15. Comparison of NO<sub>x</sub> Road Segment IQR Source Contribution for SIBaR and Apte.**

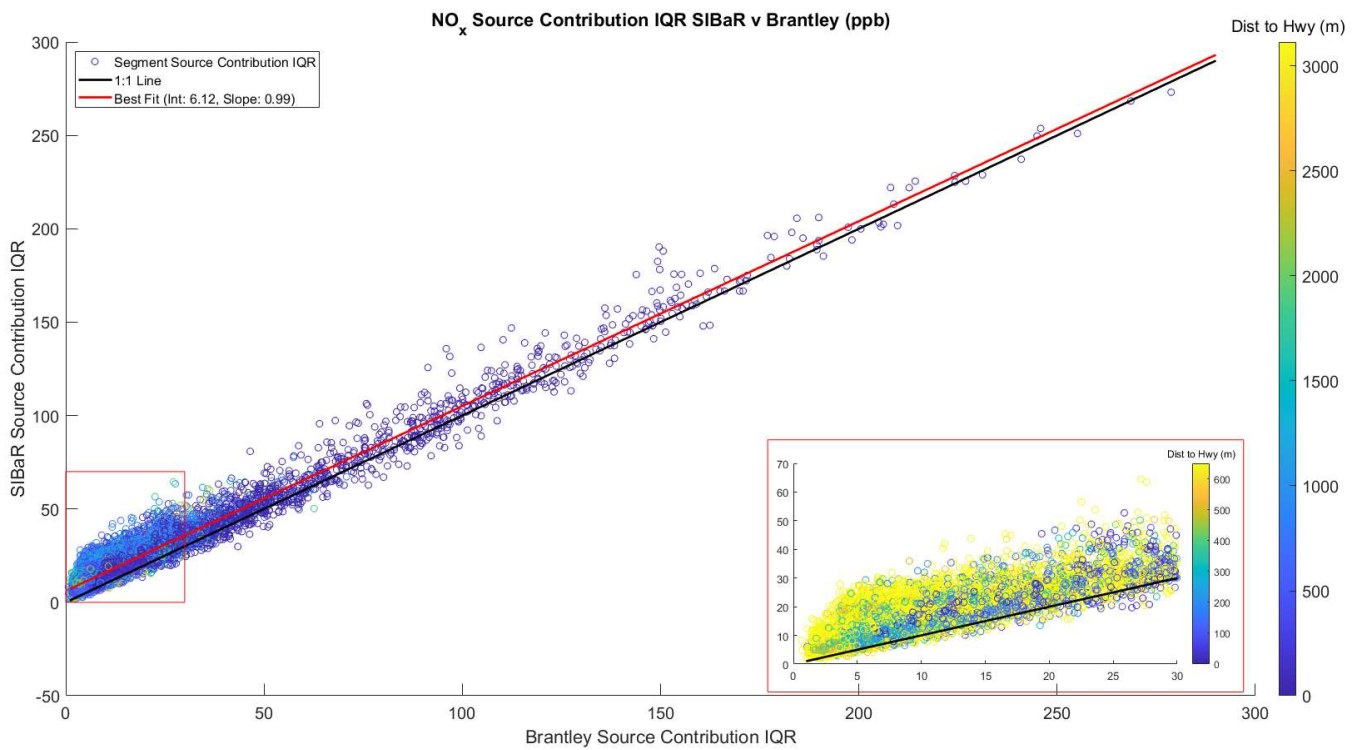

**Figure S16. Comparison of NO<sub>x</sub> Road Segment IQR Source Contribution for SIBaR and Brantley.**

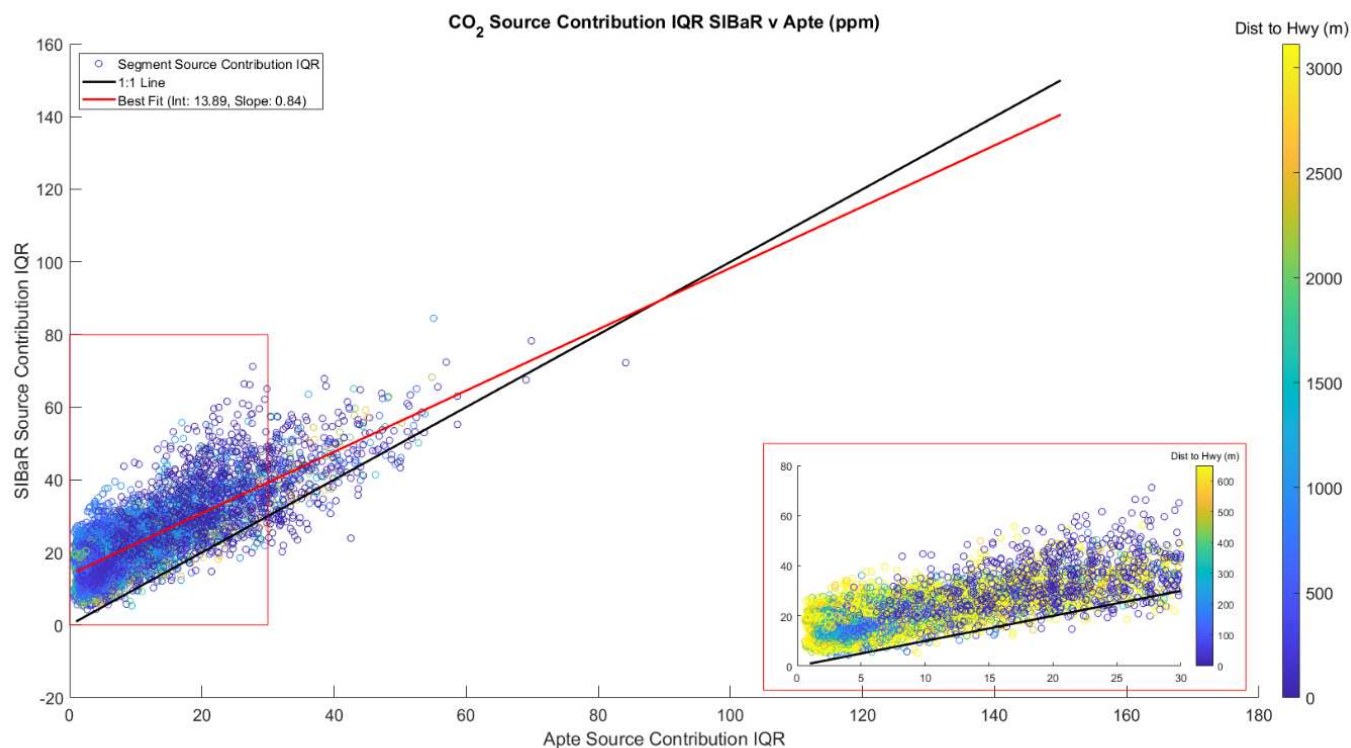

**Figure S17. Comparison of CO<sub>2</sub> Road Segment IQR Source Contribution for SIBaR and Apte.**

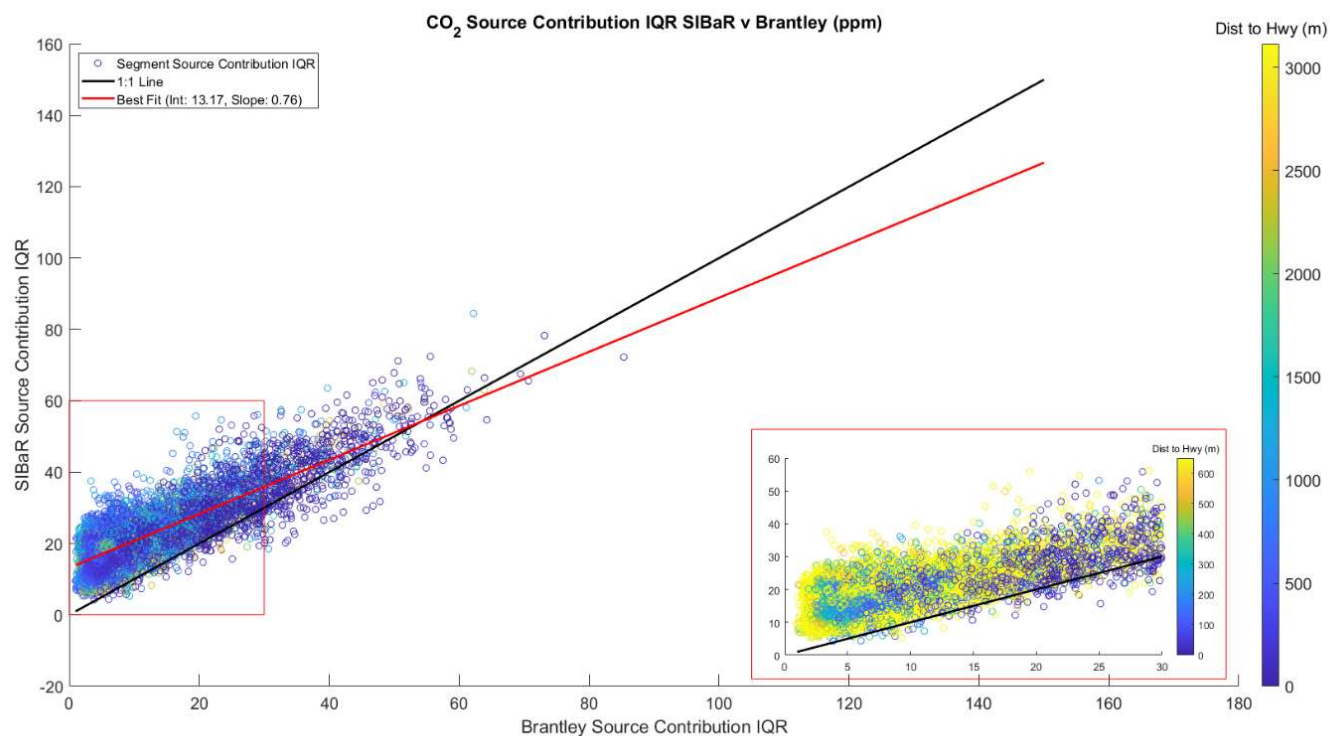

**Figure S18. Comparison of CO<sub>2</sub> Road Segment IQR Source Contribution for SIBaR and Brantley.**

## References

Census 2010 Tracts, [online] Available from: <https://cohgis-mycity.opendata.arcgis.com/datasets/census-2010-tracts> (Accessed 23 November 2020)

Finding pollution—and who it impacts most—in Houston, Environmental Defense Fund [online] Available from: <https://www.edf.org/maps/airqualitymaps/houston/pollution-map/> (Accessed 23 November 2020).
